# Supplementary material
Source: PubMed Central journal article supplement (PMC2993630)
Supplement: blood-2010-01-261206_1.pdf [file blood-2010-01-261206_1.pdf]

|                                | Cd40l <sup>+/+</sup> Apoe <sup>-/-</sup> | Cd40l <sup>-/-</sup> Apoe <sup>-/-</sup> |
|--------------------------------|------------------------------------------|------------------------------------------|
| RBC (x10 <sup>12</sup> /L)     | 6.8 ± 0.1                                | 6.5 ± 0.3                                |
| WBC (x10 <sup>9</sup> /L)      | 1.8 ± 0.2                                | 2.1 ± 0.3                                |
| Hemoglobin (g/l)               | 6.6 ± 0.1                                | 6.2 ± 0.2                                |
| Hematocrit (v)                 | 0.31 ± 0.01                              | 0.31 ± 0.01                              |
| Platelets (10 <sup>9</sup> /L) | 1074 ± 74                                | 1091 ± 92                                |
| Bleeding time (min)            | 2'51" ± 14"                              | 3'11" ± 17'                              |
| GPIb $\alpha$ (MFI)            | 94 ± 1                                   | 92 ± 1                                   |
| Clot retraction                | +++                                      | +++                                      |

### Table S1

Hematologic and hemostatic parameters of *Cd40l<sup>+/+</sup> Apoe<sup>-/-</sup>* and *Cd40l<sup>-/-</sup> Apoe<sup>-/-</sup>* mice. RBC, red blood cell count, WBC, white blood cell count, levels of GPIb $\alpha$  expression of thrombin-activated platelets (mean fluorescent intensity, MFI). Clot retraction was complete in both groups after 60 minutes.

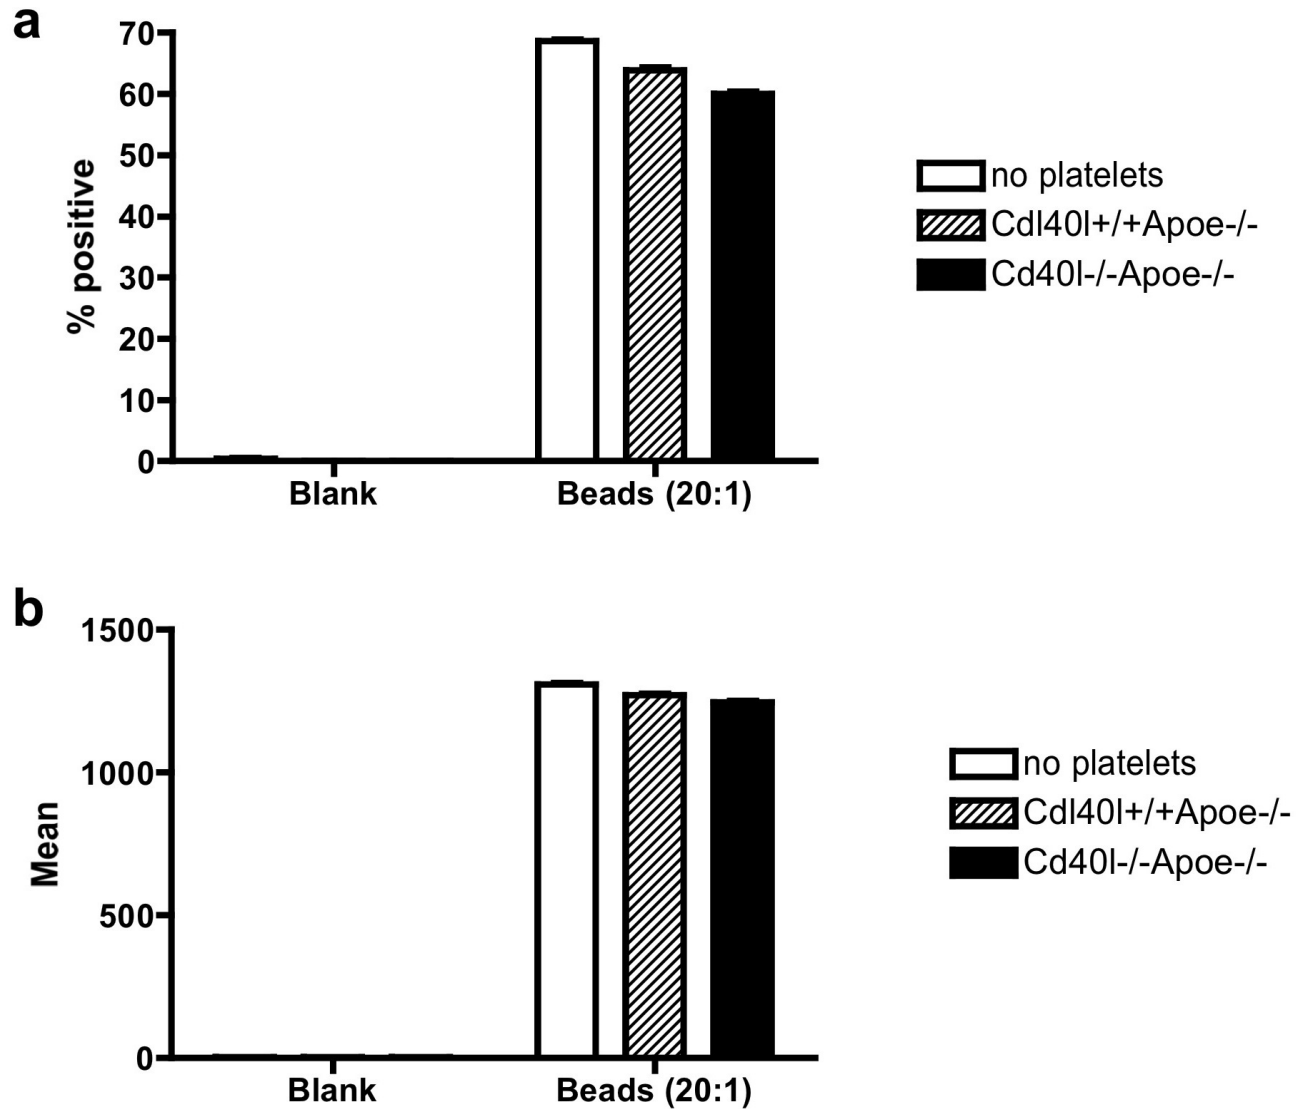

**Figure S1**

Platelets and platelet CD40L do not affect macrophage phagocytosis in vitro. Flow cytometric analysis of uptake of fluorescently labeled beads by macrophages co-cultured with thrombin-activated Cd40l<sup>+/+</sup>Apoe<sup>-/-</sup> or Cd40l<sup>-/-</sup>Apoe<sup>-/-</sup> platelets. **(a)** The percentage of positive cells represents the amount of macrophages that have taken up one or more beads. **(b)** The mean fluorescence of positive cells indicates the average amount of beads taken up per cell. Graphs show the mean values  $\pm$  SEM of 6 samples per condition.

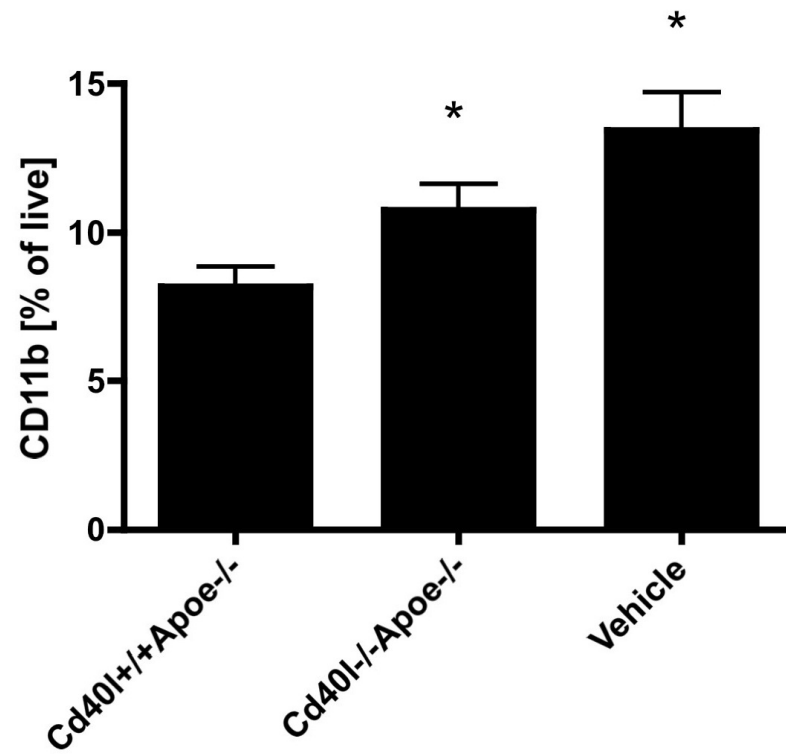

## Figure S2

Percentage of CD11b<sup>+</sup> cells of all leukocytes in blood from adult *Apoe*<sup>-/-</sup> mice treated with activated *Cd40l*<sup>+/+</sup>*Apoe*<sup>-/-</sup> or *Cd40l*<sup>-/-</sup>*Apoe*<sup>-/-</sup> platelets or vehicle. (n=8/group, \* p<0.05, vs *Cd40l*<sup>+/+</sup>*Apoe*<sup>-/-</sup>)
